# Supplementary material
Source: publisher figshare collection journal article supplement (https://gsapubs.figshare.com/ndownloader/files/23299541)
Supplement: Supplementary file 1 [file 23299541]

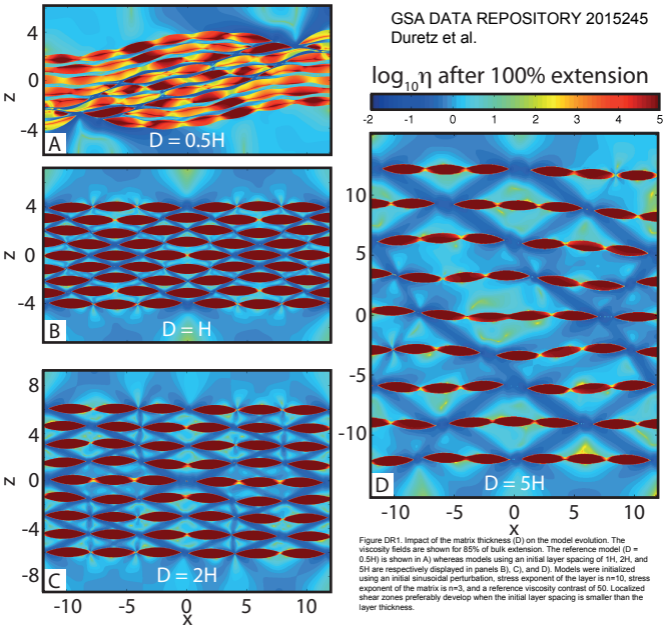

Figure DR2  $\log_{10} \eta$  after 63% extension

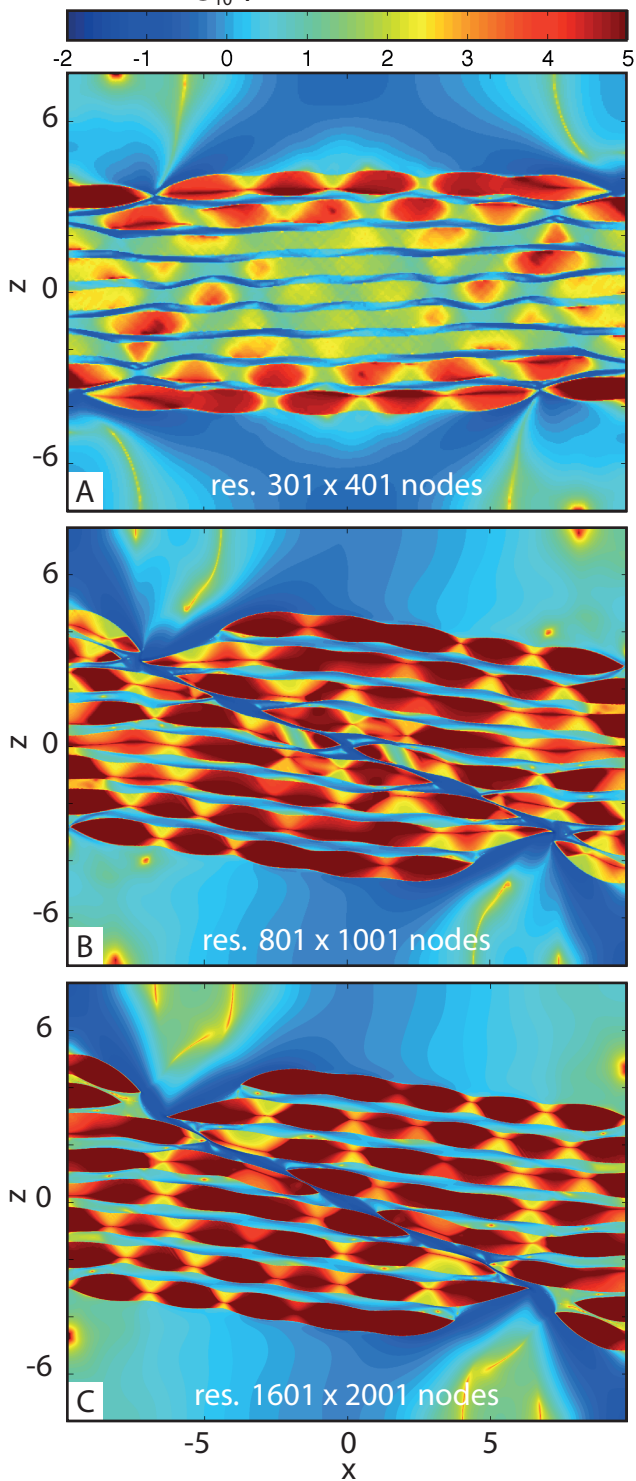

Figure DR2. Impact of the numerical resolution on the model results. The color palette corresponds to the viscosity field after 63% bulk extension. The power-law stress exponent of the matrix is  $n=5$  and in the layers is  $n=25$ . The initial viscosity contrast was 30 and necking was initialized with a sinusoidal perturbation. The low-resolution model (panel A) produces significantly different results than the reference model (panel B). Higher resolution (panel C) exhibits a behavior similar to that of the moderate resolution model (panel B), which indicates that the model results converge with decreasing grid spacing.
